# Supplementary material for: Responses of AI Chatbots to Testosterone Replacement Therapy: Patient's Beware!
Source: Preprints.org preprint supplement (doi:10.20944/preprints202410.0152.v1), 2024-10-02
Supplement: Supplementary file 1 [file supplementary]

**Supplemental Data 1**

ChatGPT 3.5 responses

1/17/2024 10:15 am

- **How do I know I have low testosterone?**

I am not a doctor, but I can provide you with some general information. If you suspect you have low testosterone, it's important to consult with a healthcare professional for a proper diagnosis. However, some common signs and symptoms of low testosterone in adult males may include:

1. **Reduced Sex Drive:** A decrease in libido or interest in sexual activity.

2. **Erectile Dysfunction:** Difficulty achieving or maintaining an erection.

3. **Fatigue:** Feeling tired or lacking energy, even with adequate rest.

4. **Depression or Irritability:** Changes in mood, including feelings of sadness or increased irritability.

5. **Loss of Muscle Mass:** Reduction in muscle mass and strength.

6. **Increased Body Fat:** Gain in body fat, especially around the abdomen.

7. **Decreased Bone Mass:** Lower bone density and an increased risk of fractures.

8. **Changes in Hair Growth:** Loss of body and facial hair.

Keep in mind that these symptoms can be associated with various health conditions, and only a healthcare professional can provide a proper diagnosis through blood tests and a comprehensive evaluation of your health. If you're experiencing any of these symptoms, it's recommended to seek medical advice.

- **I am tired all the time, does that mean I have low testosterone?**

Fatigue can be caused by various factors, and while low testosterone is one possible cause, it's important not to jump to conclusions. Many factors can contribute to fatigue, including:

1. **Lack of Sleep:** Poor quality or insufficient sleep can lead to fatigue.

2. **Stress and Anxiety:** Mental health issues can impact energy levels.

3. **Diet and Nutrition:** Poor nutrition or dehydration can contribute to fatigue.

4. **Medical Conditions:** Chronic conditions such as anemia, thyroid disorders, or diabetes can cause fatigue.

5. **Medications:** Some medications may have fatigue as a side effect.

If you're experiencing persistent fatigue, it's advisable to consult with a healthcare professional. They can help identify the underlying cause through a thorough evaluation, which may include blood tests to check testosterone levels, among other things. Avoid self-diagnosis and seek professional medical advice for a proper assessment of your symptoms.

- **Will testosterone make me feel more energetic?**

Testosterone plays a crucial role in various bodily functions, including energy levels and overall well-being. If you have low testosterone levels and receive appropriate treatment, it may help alleviate some symptoms, including fatigue. However, it's important to note that the relationship between testosterone and energy levels is complex, and increasing testosterone alone may not be a guaranteed solution for everyone.

Testosterone replacement therapy (TRT) is a medical intervention prescribed by healthcare professionals to treat men with clinically low testosterone levels. The potential benefits of TRT may include:

1. **Increased Energy Levels:** Some individuals may experience a boost in energy and a reduction in fatigue.

2. **Improved Mood:** Testosterone can influence mood, and TRT may help alleviate symptoms of depression or irritability.

3. **Enhanced Libido:** Increased testosterone levels may contribute to improvements in sexual function and libido.

However, it's crucial to approach testosterone replacement therapy under the guidance of a healthcare professional. TRT has potential risks and side effects, and it should only be used when medically necessary.

If you suspect you have low testosterone and are experiencing symptoms like fatigue, consult with a healthcare provider. They can conduct necessary tests and determine an appropriate course of action tailored to your individual health needs. Self-diagnosis and self-treatment without professional guidance are not recommended.

- **Will testosterone make me feel younger?**

Testosterone replacement therapy (TRT) is sometimes associated with improvements in certain aspects that are commonly associated with youth, but it's important to approach this with realistic expectations. TRT is typically prescribed to address symptoms of low testosterone levels in men, and its effects can vary from person to person.

Potential benefits of TRT that some individuals may experience include:

1. **Increased Energy and Vitality:** Some people report feeling more energetic and vital after receiving testosterone replacement therapy.

2. **Improved Mood:** Testosterone can influence mood, and TRT may help alleviate symptoms of irritability or depression associated with low testosterone.

3. **Enhanced Libido:** Testosterone is crucial for sexual function, and TRT may improve libido and sexual performance in some individuals.

However, it's essential to note that TRT is not a fountain of youth, and its effects are not universal. Additionally, there are potential risks and side effects associated with testosterone replacement therapy, and it should only be used when medically necessary under the guidance of a healthcare professional.

Before considering TRT, it's crucial to consult with a healthcare provider who can assess your individual health situation, conduct necessary tests, and determine the most appropriate course of action. Self-prescribing or seeking TRT without professional guidance is not recommended.

- **Is testosterone good for losing weight?**

Testosterone plays a role in metabolism and body composition, and low testosterone levels have been associated with changes in fat distribution and decreased muscle mass. However, the relationship between testosterone and weight loss is complex, and it's essential to approach the topic with caution.

Some potential ways in which testosterone may influence weight and body composition include:

1. **Muscle Mass:** Testosterone is important for the development and maintenance of muscle mass. Increasing muscle mass can contribute to a higher resting metabolic rate, potentially aiding in weight management.

2. **Fat Distribution:** Low testosterone levels have been linked to an increase in fat accumulation, particularly around the abdomen. Addressing low testosterone through appropriate treatment may help regulate fat distribution.

It's important to note that while testosterone may play a role, weight management is a multifaceted issue. Other factors such as diet, exercise, and overall lifestyle choices are critical in achieving and maintaining a healthy weight.

Testosterone replacement therapy (TRT) is a medical intervention prescribed for individuals with clinically low testosterone levels. While some people undergoing TRT may experience changes in body composition, it is not a weight-loss treatment, and its effects can vary among individuals.

If you are considering addressing weight-related concerns, it's advisable to consult with a healthcare professional. They can assess your overall health, conduct necessary tests, and provide guidance on appropriate interventions, which may include lifestyle changes, dietary adjustments, and, if necessary, hormone therapy under medical supervision.

- **Can I use testosterone to improve my mood?**

Testosterone does play a role in mood regulation, and low testosterone levels have been associated with symptoms such as irritability, fatigue, and mood swings. Testosterone replacement therapy (TRT) is a medical intervention prescribed for individuals with clinically low testosterone levels, and it may help improve mood in some cases.

Potential ways in which testosterone may influence mood include:

1. **Reduction of Irritability:** Some individuals with low testosterone levels may experience irritability or mood swings, and addressing the underlying hormonal imbalance through TRT may alleviate these symptoms.

2. **Enhanced Well-Being:** Testosterone can contribute to an overall sense of well-being, and individuals undergoing TRT may report improvements in mood and mental health.

It's important to note that the effects of testosterone on mood can vary from person to person. Additionally, TRT is a medical intervention that should only be administered under the guidance of a healthcare professional. Self-prescribing or using testosterone without proper medical supervision can have potential risks and side effects.

If you're experiencing mood-related symptoms and suspect they may be linked to low testosterone levels, it's recommended to consult with a healthcare provider. They can assess your hormonal levels, overall health, and provide guidance on appropriate interventions, which may include lifestyle changes or medical treatments under professional supervision.

- **Will testosterone improve my sex drive?**

Testosterone is a key hormone that plays a crucial role in sexual function, including libido (sex drive). Low testosterone levels can be associated with a decrease in sexual desire and may contribute to sexual dysfunction. In such cases, testosterone replacement therapy (TRT) may be prescribed by healthcare professionals to address the hormonal imbalance and potentially improve sex drive.

Potential ways in which testosterone may influence sexual function include:

1. **Increased Libido:** Testosterone is known to play a role in sexual desire, and individuals with low testosterone levels may experience an improvement in libido with appropriate treatment.

2. **Improved Erectile Function:** Testosterone is involved in the regulation of blood flow to the genital area, and TRT may help improve erectile function in some individuals.

It's important to note that while testosterone replacement therapy can be effective in addressing sexual symptoms associated with low testosterone, it may not be a solution for all cases of sexual dysfunction. Additionally, TRT has potential risks and side effects, and it should only be used under the guidance of a healthcare professional.

If you're experiencing changes in sexual desire or function and suspect it may be related to low testosterone, it's recommended to consult with a healthcare provider. They can assess your hormonal levels, overall health, and provide guidance on the most appropriate interventions, which may include lifestyle changes or medical treatments under professional supervision.

- **Will testosterone improve my erections?**

Testosterone plays a role in regulating blood flow to the genital area, and low testosterone levels can contribute to erectile dysfunction in some individuals. Testosterone replacement therapy (TRT) is a medical intervention prescribed by healthcare professionals to address clinically low testosterone levels, and it may help improve erectile function in certain cases.

Potential ways in which testosterone may influence erections include:

1. **Increased Blood Flow:** Testosterone contributes to the regulation of blood flow, and adequate blood flow to the genital area is essential for achieving and maintaining erections.

2. **Improved Sexual Desire:** Testosterone is involved in sexual desire (libido), and addressing low testosterone levels through TRT may lead to an improvement in libido, which can positively impact erectile function.

It's important to note that the effectiveness of testosterone replacement therapy on erectile function can vary among individuals. Additionally, TRT is a medical intervention that should only be administered under the guidance of a healthcare professional. Self-prescribing or using testosterone without proper medical supervision can have potential risks and side effects.

If you're experiencing difficulties with erectile function and suspect it may be related to low testosterone, it's recommended to consult with a healthcare provider. They can assess your hormonal levels, overall health, and provide guidance on appropriate interventions, which may include lifestyle changes or medical treatments under professional supervision.

- **Does testosterone make bones stronger?**

Yes, testosterone plays a role in maintaining bone density, and adequate levels of testosterone are important for bone health. Testosterone contributes to the process of bone remodeling, which involves the formation of new bone tissue and the breakdown of old bone. As a result, having sufficient testosterone is associated with stronger bones.

Low testosterone levels, especially in older men, have been linked to a higher risk of osteoporosis and fractures due to decreased bone density. Testosterone replacement therapy (TRT) may be prescribed by healthcare professionals to address clinically low testosterone levels and help maintain bone health.

It's important to note that while testosterone can have a positive impact on bone density, other factors such as diet, physical activity, and overall lifestyle also play crucial roles in maintaining bone health. Additionally, the decision to undergo TRT should be made in consultation with a healthcare provider, as TRT has potential risks and side effects.

If you have concerns about bone health or suspect low testosterone levels, it's recommended to consult with a healthcare professional. They can assess your hormonal levels, overall health, and provide guidance on appropriate interventions, which may include lifestyle changes or medical treatments under professional supervision.

- **What are the side effects of testosterone replacement therapy?**

Testosterone replacement therapy (TRT) can have both potential benefits and side effects. It's important to note that individual responses to TRT can vary, and the decision to undergo this therapy should be made under the guidance of a healthcare professional. Some potential side effects of testosterone replacement therapy include:

1. **Fluid Retention:** Some individuals may experience water retention or swelling.

2. **Acne:** An increase in acne or skin oiliness can occur.

3. **Changes in Mood:** Mood swings, irritability, or aggression may occur.

4. **Sleep Apnea:** TRT has been associated with an increased risk of sleep apnea, especially in individuals with pre-existing risk factors.

5. **Breast Enlargement (Gynecomastia):** Some men may experience breast enlargement due to hormonal changes.

6. **Testicular Atrophy:** Prolonged TRT may lead to a decrease in testicular size.

7. **Changes in Cholesterol Levels:** TRT can affect lipid profiles, potentially leading to changes in cholesterol levels.

8. **Increased Red Blood Cell Count:** TRT can stimulate the production of red blood cells, which may increase the risk of blood clots.

9. **Decreased Sperm Production:** TRT can suppress sperm production, impacting fertility.

10. **Prostate Issues:** There is ongoing debate and research regarding the potential impact of TRT on the prostate. It's important for individuals with prostate conditions to discuss this with their healthcare provider.

It's crucial to have regular follow-up appointments with a healthcare provider during TRT to monitor for potential side effects and adjust treatment as needed. Additionally, individuals considering TRT should discuss their medical history, overall health, and potential risks with a healthcare professional to make informed decisions about treatment. TRT should only be prescribed when clinically indicated and under the supervision of a qualified healthcare provider.

- **Does testosterone cause heart attacks / stroke?**

The relationship between testosterone and cardiovascular health is complex, and the impact of testosterone on the risk of heart attacks or strokes is a subject of ongoing research and debate. Some studies suggest a potential association between low testosterone levels and cardiovascular issues, while others raise concerns about the risks of testosterone replacement therapy (TRT).

It's important to note the following considerations:

1. **Low Testosterone and Cardiovascular Risk:** Low testosterone levels have been associated with certain cardiovascular risk factors, such as obesity, insulin resistance, and metabolic syndrome. Some studies suggest a potential link between low testosterone and an increased risk of cardiovascular events.

2. **Testosterone Replacement Therapy (TRT):** The safety of testosterone replacement therapy is a topic of ongoing research. Some studies have suggested potential cardiovascular risks associated with TRT, while others have not found a significant increase in cardiovascular events. The decision to undergo TRT should be made on an individual basis, weighing potential benefits against risks.

3. **Individual Variability:** Responses to testosterone levels and TRT can vary among individuals. Factors such as age, overall health, and pre-existing cardiovascular conditions can influence how the body responds to changes in testosterone levels.

It's crucial for individuals considering testosterone replacement therapy to discuss their cardiovascular health and overall risk factors with a healthcare provider. Before starting TRT, a thorough assessment of cardiovascular health and other relevant factors should be conducted.

If you have concerns about testosterone, cardiovascular health, or are considering TRT, it's recommended to consult with a healthcare professional. They can provide personalized advice based on your individual health status and help you make informed decisions about potential treatments.

Perplexity AI

1/22/2024 3:30pm

- **How do I know if I have low testosterone?**

Low testosterone, also known as low-T, can affect men in various ways, resulting in a range of symptoms. To determine if you have low testosterone, it is essential to look for signs and consult a healthcare provider. Some common signs of low testosterone include:

1. Low sex drive

2. Difficulty achieving and maintaining an erection

3. Hot flashes

4. Hair loss

5. Fatigue

6. Decreased muscle mass and strength

7. Bone loss

8. Increase in body fat

9. Depression

10. Trouble concentrating

11. Sleep problems such as insomnia

12. Lower energy level, endurance, and physical strength

13. Poor memory

14. Difficulty with finding words to say

15. Poor focus

16. Not doing well at work[2][4][5]

If you experience any of these symptoms, it is essential to consult a healthcare provider. They can perform a physical exam, ask questions about your medical history, and order blood tests to confirm low testosterone and determine the cause[3]. Testosterone replacement therapy is a common treatment for low testosterone and can help reduce symptoms[2].

Citations:

[1] <https://www.urologyhealth.org/urology-a-z/l/low-testosterone>

[2] <https://www.healthline.com/health/low-testosterone/warning-signs>

[3] <https://my.clevelandclinic.org/health/diseases/15603-low-testosterone-male-hypogonadism>

[4] <https://medlineplus.gov/ency/patientinstructions/000722.htm>

[5] <https://www.besturologyclinic.com/blog/think-you-might-have-low-testosterone-here-are-the-signs>

- **I am tired all the time, does that mean I have low testosterone?**

Feeling tired all the time does not necessarily mean you have low testosterone. Fatigue can be a symptom of many health conditions and lifestyle factors. However, low testosterone can cause fatigue, and it is one of the signs associated with low testosterone levels[1][2]. Other symptoms of low testosterone include:

- Low sex drive

- Difficulty achieving and maintaining an erection

- Low sperm count

- Sleep problems such as insomnia

- Decrease in muscle size and strength

- Bone loss

- Increase in body fat

- Depression

- Trouble concentrating[1]

If you are experiencing fatigue along with other symptoms listed above, it might be worth consulting a healthcare provider to determine if low testosterone could be the cause. They can perform a physical exam, ask questions about your medical history, and order blood tests to confirm low testosterone and determine the cause[3].

Citations:

[1] <https://medlineplus.gov/ency/patientinstructions/000722.htm>

[2] <https://www.besturologyclinic.com/blog/think-you-might-have-low-testosterone-here-are-the-signs>

[3] <https://www.healthline.com/health/low-testosterone/warning-signs>

[4] <https://www.urologyhealth.org/urology-a-z/l/low-testosterone>

[5] <https://www.webmd.com/men/ss/slideshow-low-testosterone-overview>

- **Will testosterone make me feel more energetic?**

Testosterone is a hormone that contributes to healthy levels of energy and an overall feeling of vitality[2]. Men with low testosterone levels may experience fatigue and low energy[3]. However, it is essential to note that testosterone is just one factor affecting energy levels, and other factors such as lifestyle, sleep, and overall health also play a role.

If you have low testosterone and are considering testosterone therapy, it may help improve your energy levels[1][2]. In a survey, 52.3% of men claimed that testosterone improved their energy[1]. However, it is essential to consult a healthcare provider to determine if testosterone therapy is appropriate for your specific situation. They can evaluate your testosterone levels, medical history, and symptoms to determine the best course of action.

In addition to testosterone therapy, you can also consider making lifestyle adjustments to boost your energy levels, such as:

1. Getting a healthy amount of sleep

2. Exercising regularly

3. Maintaining a balanced diet

4. Managing stress

5. Addressing any underlying health conditions that may be contributing to fatigue[4][5].

Citations:

[1] <https://www.ncbi.nlm.nih.gov/pmc/articles/PMC6765788/>

[2] <https://drhasanbaddaymd.com/blog/can-testosterone-therapy-make-me-less-tired/>

[3] <https://www.webmd.com/men/ss/slideshow-low-t-effects>

[4] <https://www.menstclinic.com/blog/low-testosterone-and-fatigue>

[5] <https://anti-agingdocs.com/faqs/how-to-fight-fatigue-low-testosterone/>

- **Will testosterone make me feel younger?**

Testosterone is a hormone that plays a role in various aspects of men's health, including energy levels, muscle mass, and bone density[2]. While it is true that testosterone levels generally decline with age[4], it is not a direct cause of aging. Testosterone therapy may help improve energy levels and muscle mass in some men with low testosterone[1][2]. However, it is essential to note that testosterone is just one factor affecting how you feel, and other factors such as lifestyle, sleep, and overall health also play a role.

In summary, testosterone may contribute to feeling more energetic and maintaining muscle mass, but it is not a magic solution to make you feel younger. It is essential to consult a healthcare provider to determine if testosterone therapy is appropriate for your specific situation. They can evaluate your testosterone levels, medical history, and symptoms to determine the best course of action. Additionally, consider making lifestyle adjustments to boost your energy levels and overall health, such as getting a healthy amount of sleep, exercising regularly, maintaining a balanced diet, managing stress, and addressing any underlying health conditions that may be contributing to fatigue[4][5].

Citations:

[1] <https://www.health.harvard.edu/newsletter_article/testosterone_aging_and_the_mind>

[2] <https://www.hss.edu/article_muscle-mass-testosterone.asp>

[3] <https://www.ncbi.nlm.nih.gov/pmc/articles/PMC2544367/>

[4] <https://www.mayoclinic.org/healthy-lifestyle/sexual-health/in-depth/testosterone-therapy/art-20045728>

[5] <https://anti-agingdocs.com/faqs/how-to-fight-fatigue-low-testosterone/>

- **Is testosterone good for losing weight?**

Testosterone is a hormone that plays a role in various aspects of men's health, including muscle mass and fat distribution[1]. While some studies suggest that testosterone therapy may lead to reduced fat mass and increased lean body mass in men with lower-than-normal testosterone levels[2][4], it is essential to note that testosterone is just one factor affecting weight loss, and other factors such as lifestyle, diet, and exercise also play a role.

In summary, testosterone may contribute to weight loss in some men with low testosterone levels, but it is not a magic solution for weight loss. It is essential to consult a healthcare provider to determine if testosterone therapy is appropriate for your specific situation. They can evaluate your testosterone levels, medical history, and symptoms to determine the best course of action. Additionally, consider making lifestyle adjustments to promote weight loss, such as:

1. Eating a balanced diet

2. Exercising regularly

3. Managing stress

4. Addressing any underlying health conditions that may be contributing to weight gain[3][5].

Citations:

[1] <https://www.healthline.com/nutrition/testosterone-and-fat-loss>

[2] <https://www.menstclinic.com/blog/what-does-testosterone-have-to-do-with-weight-loss>

[3] <https://www.everlywell.com/blog/testosterone/testosterone-weight-loss/>

[4] <https://www.ncbi.nlm.nih.gov/pmc/articles/PMC4154787/>

[5] <https://pubmed.ncbi.nlm.nih.gov/25105998/>

- **Can I use testosterone to improve my mood?**

Testosterone is a hormone that plays a role in various aspects of men's health, including mood regulation[1]. Low testosterone levels have been associated with symptoms similar to depression, such as lack of energy, anxiety, and irritability[1]. Testosterone replacement therapy has been shown to improve depression in men with hypogonadism[1]. However, it is essential to note that testosterone is just one factor affecting mood, and other factors such as lifestyle, sleep, and overall health also play a role.

In summary, testosterone may contribute to improving your mood, particularly if you have low testosterone levels. However, it is not a magic solution for mood improvement. It is essential to consult a healthcare provider to determine if testosterone therapy is appropriate for your specific situation. They can evaluate your testosterone levels, medical history, and symptoms to determine the best course of action. Additionally, consider making lifestyle adjustments to promote a better mood, such as:

1. Eating a balanced diet

2. Exercising regularly

3. Managing stress

4. Addressing any underlying health conditions that may be contributing to mood issues[3][5].

Citations:

[1] <https://www.menstclinic.com/blog/testosterone-and-depression-whats-the-connection>

[2] <https://pubmed.ncbi.nlm.nih.gov/24016385/>

[3] <https://www.ncbi.nlm.nih.gov/pmc/articles/PMC6765788/>

[4] <https://www.health.harvard.edu/staying-healthy/testosterone--what-it-does-and-doesnt-do>

[5] <https://pubmed.ncbi.nlm.nih.gov/32657051/>

- **Will testosterone improve my sex drive?**

Testosterone is a hormone that plays a significant role in men's sexual health, including sex drive and performance[1][4]. A strong correlation between serum testosterone levels and libido in men has been reliably and repeatedly demonstrated[1]. Testosterone therapy has been shown to improve sexual desire in men with hypogonadism[1][2]. However, it is essential to note that testosterone is just one factor affecting sex drive, and other factors such as lifestyle, mental state, and cultural values also play a role[1].

In summary, testosterone may contribute to improving your sex drive, particularly if you have low testosterone levels. However, it is not a magic solution for improving sex drive. It is essential to consult a healthcare provider to determine if testosterone therapy is appropriate for your specific situation. They can evaluate your testosterone levels, medical history, and symptoms to determine the best course of action. Additionally, consider making lifestyle adjustments to promote a better sex life, such as:

1. Eating a balanced diet

2. Exercising regularly

3. Managing stress

4. Addressing any underlying health conditions that may be contributing to sexual issues[3][5].

Citations:

[1] <https://www.liebertpub.com/doi/full/10.1089/andro.2021.0034>

[2] <https://pubmed.ncbi.nlm.nih.gov/29704917/>

[3] <https://www.health.harvard.edu/staying-healthy/testosterone--what-it-does-and-doesnt-do>

[4] <https://www.health.harvard.edu/mens-health/the-facts-about-testosterone-and-sex>

[5] <https://www.health.harvard.edu/newsletter_article/testosterone_aging_and_the_mind>

- **Will testosterone improve my erections?**

Testosterone is a hormone that plays a role in men's sexual health, including erectile function[1][4]. In hypogonadal men, low testosterone levels have been associated with erectile dysfunction[1]. Testosterone therapy has been shown to improve erectile function in men with hypogonadism[1][3]. However, it is essential to note that testosterone is just one factor affecting erections, and other factors such as lifestyle, mental state, and cultural values also play a role[1].

In summary, testosterone may contribute to improving your erections, particularly if you have low testosterone levels. However, it is not a magic solution for improving erections. It is essential to consult a healthcare provider to determine if testosterone therapy is appropriate for your specific situation. They can evaluate your testosterone levels, medical history, and symptoms to determine the best course of action. Additionally, consider making lifestyle adjustments to promote better erections, such as:

1. Eating a balanced diet

2. Exercising regularly

3. Managing stress

4. Addressing any underlying health conditions that may be contributing to erectile issues[3][5].

Citations:

[1] <https://www.liebertpub.com/doi/full/10.1089/andro.2021.0033>

[2] <https://www.ncbi.nlm.nih.gov/pmc/articles/PMC1476110/>

[3] <https://pubmed.ncbi.nlm.nih.gov/29704917/>

[4] <https://www.health.harvard.edu/blog/a-logical-approach-to-treating-erectile-dysfunction-201211275583>

[5] <https://www.amjmed.com/article/S0002-9343(05)00642-X/fulltext>

- **Does testosterone make bones stronger?**

Testosterone is a hormone that plays a role in bone health in men[1]. It has been shown to exert anabolic effects on different bone surfaces and contribute to maintaining bone mineral density (BMD)[1]. In hypogonadal men, low testosterone levels have been associated with an increase in bone turnover, bone loss, and fracture risk[1]. Testosterone treatment has been shown to increase BMD and estimated bone strength in men[2]. However, it is essential to note that testosterone is just one factor affecting bone health, and other factors such as lifestyle, diet, and overall health also play a role.

In summary, testosterone may contribute to making bones stronger, particularly in men with low testosterone levels. However, it is not a magic solution for improving bone health. It is essential to consult a healthcare provider to determine if testosterone therapy is appropriate for your specific situation. They can evaluate your testosterone levels, medical history, and symptoms to determine the best course of action. Additionally, consider making lifestyle adjustments to promote better bone health, such as:

1. Eating a balanced diet rich in calcium and vitamin D

2. Exercising regularly, including weight-bearing exercises

3. Managing stress

4. Addressing any underlying health conditions that may be contributing to bone issues[3][5].

Citations:

[1] <https://www.ncbi.nlm.nih.gov/pmc/articles/PMC5036835/>

[2] <https://jamanetwork.com/journals/jamainternalmedicine/fullarticle/2604138>

[3] <https://www.nature.com/articles/s41598-022-21008-7>

[4] <https://www.ncbi.nlm.nih.gov/pmc/articles/PMC7867125/>

[5] <https://academic.oup.com/jcem/article/82/8/2386/2877617>

- **What are the side effects of testosterone replacement therapy?**

Testosterone replacement therapy (TRT) can have various side effects and risks, some of which include:

1. Rash, itching, or irritation at the application site[1]

2. Acne[2][3]

3. Disturbed breathing while sleeping[3]

4. Breast swelling or tenderness[3]

5. Swelling in the ankles[3]

6. High red blood cell counts, which could increase the risk of clotting[3]

7. Increased risk of heart attack, stroke, and deaths from heart disease, especially in men with pre-existing heart conditions[3][4]

8. Decreased sperm count[2]

9. Polycythemia and peripheral edema[2]

10. Increase in sex hormone-binding globulin, which can decrease bioavailable testosterone[2]

It is essential to consult a healthcare provider to determine if testosterone therapy is appropriate for your specific situation. They can evaluate your testosterone levels, medical history, and symptoms to determine the best course of action. Additionally, consider making lifestyle adjustments to promote better overall health, such as:

1. Eating a balanced diet

2. Exercising regularly

3. Managing stress

4. Addressing any underlying health conditions that may be contributing to your symptoms[5].

Citations:

[1] <https://www.webmd.com/men/testosterone-replacement-therapy-is-it-right-for-you>

[2] <https://www.ncbi.nlm.nih.gov/pmc/articles/PMC3897047/>

[3] <https://www.health.harvard.edu/mens-health/is-testosterone-therapy-safe-take-a-breath-before-you-take-the-plunge>

[4] <https://www.ncbi.nlm.nih.gov/pmc/articles/PMC4212439/>

[5] <https://www.mayoclinic.org/healthy-lifestyle/sexual-health/in-depth/testosterone-therapy/art-20045728>

- **Does testosterone cause heart attacks / stroke?**

Testosterone replacement therapy (TRT) has been a topic of debate regarding its potential impact on heart attacks and strokes. Some studies suggest that TRT may reduce the risk of heart attacks and strokes in men with unnaturally low testosterone levels[1][2]. However, other research has found no significant difference in the rate of heart attacks, strokes, or death from cardiovascular problems between men receiving TRT and those receiving a placebo[3].

In summary, the relationship between testosterone and heart attacks or strokes is complex and not yet fully understood. It is essential to consult a healthcare provider to determine if testosterone therapy is appropriate for your specific situation. They can evaluate your testosterone levels, medical history, and symptoms to determine the best course of action. Additionally, consider making lifestyle adjustments to promote better overall health, such as:

1. Eating a balanced diet

2. Exercising regularly

3. Managing stress

4. Addressing any underlying health conditions that may be contributing to your symptoms[4][5].

Citations:

[1] <https://uroweb.org/press-releases/testosterone-therapy-reduces-heart-attack-and-stroke>

[2] <https://www.pharmacytimes.com/view/study-testosterone-supplementation-reduces-heart-attack-stroke-risk>

[3] <https://www.health.harvard.edu/mens-health/testosterone-therapy-may-be-safe-for-men-at-risk-for-heart-attack-and-stroke>

[4] <https://www.healthline.com/health/heart-attack/testosterone-heart-attack>

[5] <https://www.nbcnews.com/health/health-news/no-heart-risks-testosterone-replacement-therapy-study-finds-rcna89229>

Google Bard

1/11/2024 1:23pm

- **How do I know if I have low testosterone?**

It's important to understand that definitively determining whether you have low testosterone requires a blood test conducted by a healthcare professional. However, there are some signs and symptoms that may indicate low testosterone levels. Here are some to watch out for:

Physical symptoms:

- **Reduced sex drive**: This is one of the most common symptoms of low testosterone. You may have little to no interest in sexual activity.


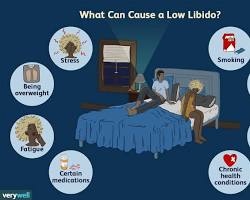


[Opens in a new window](https://www.verywellmind.com/help-for-women-with-low-sex-drive-2300705)

[
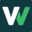
](https://www.verywellmind.com/help-for-women-with-low-sex-drive-2300705)[www.verywellmind.com](http://www.verywellmind.com)Reduced sex drive

- **Erectile dysfunction**: You may have difficulty getting or maintaining an erection.


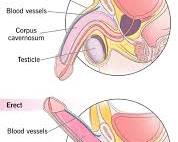


[Opens in a new window](https://my.clevelandclinic.org/health/diseases/10035-erectile-dysfunction)

[
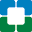
clevelandclinic.org](https://my.clevelandclinic.org/health/diseases/10035-erectile-dysfunction)

Erectile dysfunction

- **Loss of muscle mass and strength**: You may find it harder to build or maintain muscle mass, and you may feel weaker than usual.


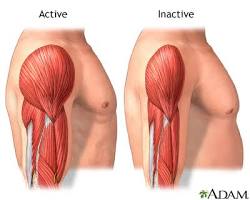


[Opens in a new window](https://www.mountsinai.org/health-library/symptoms/muscle-atrophy)

[
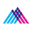
www.mountsinai.org](https://www.mountsinai.org/health-library/symptoms/muscle-atrophy)

Loss of muscle mass and strength

- **Increased body fat**: You may gain weight, especially around your abdomen, even if you're not eating more calories.


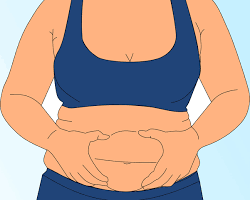


[Opens in a new window](https://www.sci.news/medicine/excessive-body-fat-brain-atrophy-dementia-stroke-risks-09900.html)

[
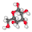
www.sci.news](https://www.sci.news/medicine/excessive-body-fat-brain-atrophy-dementia-stroke-risks-09900.html)

Increased body fat

- **Loss of bone density**: This can lead to an increased risk of osteoporosis.


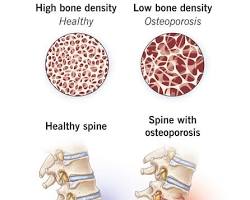


[Opens in a new window](https://my.clevelandclinic.org/health/diseases/4443-osteoporosis)

[
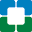
my.clevelandclinic.org](https://my.clevelandclinic.org/health/diseases/4443-osteoporosis)

Loss of bone density

- **Hair loss**: You may lose hair on your head, face, and body.


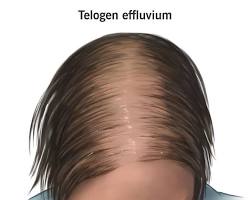


[Opens in a new window](https://my.clevelandclinic.org/health/diseases/24486-telogen-effluvium)

[
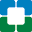
clevelandclinic.org](https://my.clevelandclinic.org/health/diseases/24486-telogen-effluvium)

Hair loss

- **Growth of breast tissue (gynecomastia)**: This is less common, but it can happen in men with very low testosterone levels.


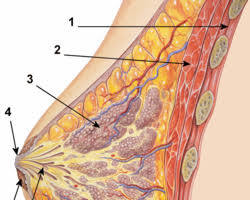


[Opens in a new window](https://en.wikipedia.org/wiki/Mammary_gland)

[
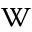
en.wikipedia.org](https://en.wikipedia.org/wiki/Mammary_gland)

Growth of breast tissue

**Other symptoms:**

- **Fatigue**: You may feel tired all the time, even if you're getting enough sleep.


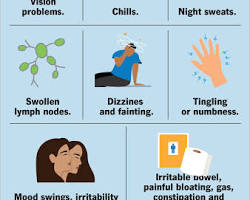


[Opens in a new window](https://my.clevelandclinic.org/health/diseases/17720-myalgic-encephalomyelitis-chronic-fatigue-syndrome-me-cfs)

[
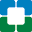
my.clevelandclinic.org](https://my.clevelandclinic.org/health/diseases/17720-myalgic-encephalomyelitis-chronic-fatigue-syndrome-me-cfs)

Fatigue

- **Decreased mood**: You may feel depressed, anxious, or irritable.


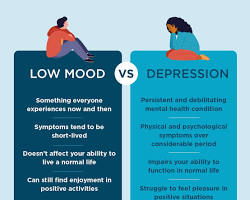


[Opens in a new window](https://www.priorygroup.com/blog/low-mood)

[
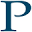
www.priorygroup.com](https://www.priorygroup.com/blog/low-mood)

Decreased mood

- **Trouble sleeping**: You may have trouble falling asleep or staying asleep.


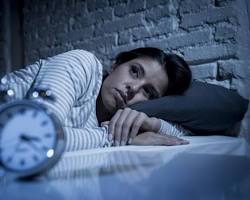


[Opens in a new window](https://www.ed.ac.uk/chaplaincy/mindfulness/the-mindletter/trouble-sleeping)

[
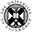
www.ed.ac.uk](https://www.ed.ac.uk/chaplaincy/mindfulness/the-mindletter/trouble-sleeping)

Trouble sleeping

- **Poor concentration and memory**: You may have difficulty focusing or remembering things.


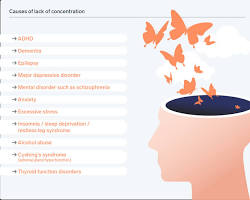


[Opens in a new window](https://www.biron.com/en/education-center/specialist-advice/poor-concentration-occasional-issue-major-disorder/)

[
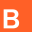
www.biron.com](https://www.biron.com/en/education-center/specialist-advice/poor-concentration-occasional-issue-major-disorder/)

Poor concentration and memory

It's important to note that these symptoms can also be caused by other conditions. If you're experiencing any of them, it's important to see a doctor to get a diagnosis.

Here are some additional things to keep in mind:

- Testosterone levels naturally decline with age. However, this doesn't mean that all men will experience low testosterone symptoms.
- Certain medical conditions, such as obesity, diabetes, and HIV/AIDS, can also increase the risk of low testosterone.
- Some medications can also cause low testosterone levels.

If you're concerned about your testosterone levels, talk to your doctor. They can order a blood test to measure your levels and discuss treatment options if necessary.

I hope this information is helpful. Please let me know if you have any other questions.

- **I am tired all the time, does that mean I have low testosterone?**

Fatigue is a very common symptom and can have many different causes, so experiencing it alone doesn't necessarily mean you have low testosterone. While low testosterone can certainly contribute to fatigue, it's important to consider other possibilities before jumping to conclusions.

Here are some factors to keep in mind:

**Other causes of fatigue**:

- **Stress**: Chronic stress can significantly drain your energy.
- **Sleep problems**: Not getting enough sleep or having disrupted sleep can leave you feeling exhausted.
- **Medical conditions**: Several medical conditions, like thyroid problems, anemia, or depression, can cause fatigue.
- **Lifestyle factors**: Poor diet, lack of exercise, and excessive alcohol or caffeine consumption can all contribute to fatigue.

**Considering Testosterone**:

- **Age**: Testosterone levels naturally decline with age, especially after 40. If you're in this age group, fatigue could be partially attributed to lower testosterone.
- **Other symptoms**: If you're experiencing other symptoms of low testosterone like decreased sex drive, muscle loss, or erectile dysfunction, then it's more likely that your fatigue could be related.

**Next steps**:

- **Talk to your doctor**: Regardless of whether you suspect low testosterone or not, it's important to discuss your fatigue with your doctor. They can perform a comprehensive evaluation to identify the underlying cause and recommend appropriate treatment.
- **Lifestyle changes**: Making healthy lifestyle adjustments like getting enough sleep, eating a balanced diet, exercising regularly, and managing stress can significantly improve your energy levels even if low testosterone isn't the main culprit.
- **Blood test**: If your doctor thinks it's appropriate, they may order a blood test to measure your testosterone levels. This can help determine if low testosterone is contributing to your fatigue and guide further treatment decisions.

Remember, self-diagnosis is not recommended and it's important to avoid jumping to conclusions. Consulting your doctor is crucial for getting a proper diagnosis and the best course of action for managing your fatigue.

- **Will testosterone make me feel more energetic?**

Whether testosterone will make you feel more energetic depends on several factors, including your current testosterone levels, the cause of your fatigue, and your overall health. Here's a breakdown:

**If you have low testosterone**:

- **Yes, testosterone therapy can significantly improve energy levels in men with hypogonadism (clinically low testosterone)**. Studies have shown that testosterone replacement therapy can lead to increased physical and mental energy, reduced fatigue, and improved quality of life.
-
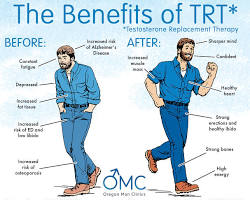

- [Opens in a new window](https://oregonmanclinics.com/our-services/testosterone-replacement-therapy/)
- [
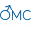
oregonmanclinics.com](https://oregonmanclinics.com/our-services/testosterone-replacement-therapy/)
- Testosterone injection therapy
- **However, it's important to note that testosterone therapy is not a magic bullet for fatigue**. If your fatigue is caused by other factors, such as stress, sleep problems, or medical conditions, testosterone therapy may not be effective.

**If you have normal testosterone levels**:

- **Testosterone therapy is unlikely to improve your energy levels**. In fact, it may even make you feel worse by causing side effects such as mood swings, acne, and hair loss.

**Therefore, it's crucial to consult a doctor before considering testosterone therapy.** They can measure your testosterone levels and rule out other potential causes of your fatigue.

Here are some additional things to keep in mind:

- **Testosterone therapy is a lifelong commitment**. Once you start testosterone therapy, you will need to continue taking it indefinitely.
- **Testosterone therapy can have serious side effects.** It's important to discuss the risks and benefits with your doctor before making a decision.
- **There are other ways to improve energy levels**. Making healthy lifestyle changes, such as getting enough sleep, eating a balanced diet, exercising regularly, and managing stress, can all help to boost your energy levels.

I hope this information helps! Please let me know if you have any other questions.

- **Will testosterone make me feel younger?**

The idea of feeling younger through testosterone therapy is a complex one, with both potential benefits and drawbacks to consider.

**Here's the breakdown**:

**Potential benefits:**

- **Increased energy and vitality**: Testosterone plays a key role in energy levels, muscle mass, and metabolism. If you have low testosterone, supplementing it can potentially boost your energy, making you feel more active and vigorous.
- **Improved mood and cognitive function**: Testosterone can also influence mood, motivation, and focus. Studies suggest that in men with low testosterone, therapy can improve symptoms of depression and enhance cognitive function.
- **Enhanced sexual function**: Low testosterone can lead to decreased libido and erectile dysfunction. Testosterone therapy can potentially improve these aspects of sexual function, boosting confidence and overall satisfaction.
- **Increased muscle mass and strength:** Testosterone plays a crucial role in building and maintaining muscle mass. For men with low testosterone, therapy can help them build muscle more easily, potentially leading to a more youthful appearance and improved physical performance.

**However, it's important to remember that**:

- **Testosterone isn't a fountain of youth**: While it can address some age-related symptoms, it won't erase wrinkles, reverse bone loss, or prevent age-related diseases.
- **Not everyone benefits**: Testosterone therapy isn't effective for everyone, and even for those who see improvements, the effects may vary.
- **Potential side effects**: Testosterone therapy can have side effects like acne, hair loss, mood swings, and increased risk of prostate problems.
- **It's not a quick fix**: The benefits of testosterone therapy typically take weeks or months to manifest and require ongoing treatment.

Ultimately, whether testosterone will make you feel younger depends on your individual circumstances and goals.

**Here are some key considerations**:

- **Your current testosterone levels:** If you have low testosterone, therapy can potentially address specific symptoms and improve your quality of life. However, if your levels are normal, therapy is unlikely to have significant anti-aging effects.
- **Your overall health:** Testosterone therapy is not suitable for everyone, especially those with certain health conditions. Consulting a doctor is crucial to assess your individual suitability and potential risks.
- **Realistic expectations:** Testosterone therapy isn't a magic bullet for aging. It can address specific issues but won't completely reverse the aging process.

Remember, **a healthy lifestyle with adequate sleep, exercise, and a balanced diet is essential for maintaining youthful vitality and well-being**. Testosterone therapy should only be considered after careful evaluation and discussion with your doctor as part of a comprehensive approach to healthy aging.

- **Is testosterone good for losing weight?**

Whether testosterone is good for losing weight is a complex issue with significant nuances to consider:

**For men with low testosterone:**

- **Yes, testosterone replacement therapy (TRT) can aid weight loss, but only if combined with a healthy lifestyle and proper medical supervision**. Studies show that TRT can help men with low testosterone levels build muscle mass while shedding fat, leading to an improved body composition and potentially helping with weight loss.
- **However, TRT isn't a standalone weight loss solution**. It shouldn't be used solely for this purpose. Diet and exercise remain crucial for sustainable weight management, and TRT alone won't magically melt pounds.

**For men with normal testosterone levels:**

- **No, testosterone supplementation is not recommended for weight loss**. In fact, it can be harmful. In individuals with normal testosterone levels, artificially boosting it can lead to adverse side effects like mood swings, acne, hair loss, and increased risk of prostate problems, without any guaranteed weight loss benefits.

**Important Points to Remember:**

- **Consult a doctor:** Always seek professional medical advice before considering TRT. They can assess your individual testosterone levels, overall health, and determine if TRT is suitable for you.
- **Lifestyle first**: Prioritize a healthy diet, regular exercise, and adequate sleep for sustainable weight management. TRT might be considered as a potential support therapy in specific cases, but only under proper medical guidance.
- **Risks and side effects**: Be aware of the potential risks and side effects associated with TRT, especially if you have underlying health conditions.

Overall, while testosterone can play a role in weight management for individuals with confirmed low testosterone under medical supervision, it's not a shortcut to weight loss for everyone. Focusing on healthy lifestyle changes remains the most effective and sustainable approach to managing your weight and optimizing overall health.

I hope this information clarifies the complexities surrounding testosterone and weight loss. If you have further questions or concerns, please consult a healthcare professional for personalized guidance.

- **Can I use testosterone to improve my mood?**

The answer to using testosterone to improve your mood is quite nuanced and depends on several factors. Here's a breakdown:

**For men with low testosterone**:

- **Yes, testosterone replacement therapy (TRT) can potentially improve mood in some cases**. Studies suggest that in men with hypogonadism (clinically low testosterone), TRT can reduce symptoms of depression, anxiety, and fatigue, leading to an overall elevated mood.
- **However, the effects can vary.** Not everyone with low testosterone experiences mood improvement with TRT, and even for those who do, the extent and duration of the effects can differ.

**For men with normal testosterone levels:**

- **No, testosterone supplementation is not recommended for improving mood.** In individuals with normal testosterone levels, artificially boosting it can have adverse effects on mood, potentially leading to increased irritability, aggression, and mood swings.

**Important Points to Remember:**

- **Consult a doctor**: If you're experiencing low mood, always seek professional medical advice before considering TRT. They can assess your testosterone levels, underlying causes of your mood issues, and determine if TRT is a suitable option.
- **Don't self-diagnose**: Low mood and low testosterone can have various causes, and self-diagnosis is risky. A doctor can help identify the root cause of your concerns and guide you towards appropriate treatment.
- **Consider alternative options:** There are numerous effective evidence-based interventions for improving mood without resorting to testosterone manipulation. These include psychotherapy, cognitive-behavioral therapy, and lifestyle changes like regular exercise and healthy sleep habits.

**In conclusion:**

- Testosterone can be a valuable tool for improving mood in men with confirmed low testosterone, but **only under proper medical supervision and as part of a comprehensive treatment plan.**
- For individuals with normal testosterone levels, using it for mood improvement is **not recommended and potentially harmful.**
- **Prioritizing a healthy lifestyle and seeking professional help remain the best options for addressing mood issues, with TRT considered only as a last resort in specific cases.**

Remember, your mental health is crucial, and taking care of it requires holistic and informed approaches. Always prioritize seeking professional guidance for optimal support and effective solutions.

- **Will testosterone improve my sex drive?**

Whether testosterone will improve your sex drive is a complex question with no one-size-fits-all answer. Here's a breakdown to help you understand the factors involved:

**Low Testosterone and Sex Drive:**

- If you have **clinically low testosterone levels (hypogonadism)**, testosterone replacement therapy (TRT) can **significantly improve your sex drive** in most cases. Studies have shown that TRT can lead to increased desire, arousal, and satisfaction.
-
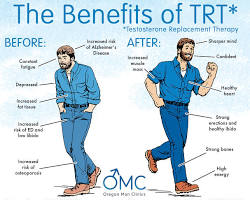

- [Opens in a new window](https://oregonmanclinics.com/our-services/testosterone-replacement-therapy/)
- [
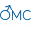
oregonmanclinics.com](https://oregonmanclinics.com/our-services/testosterone-replacement-therapy/)
- Testosterone replacement therapy

**Normal Testosterone and Sex Drive:**

- If your testosterone levels are **within the normal range**, supplementing with testosterone is **unlikely to increase your sex drive**. In fact, it can even have the opposite effect, potentially causing decreased libido and erectile dysfunction.

**Other Factors Affecting Sex Drive:**

- Your sex drive is influenced by a complex interplay of physical, psychological, and social factors. These include:
  - **Stress and anxiety**
  - **Relationship issues**
  - **Depression**
  - **Medical conditions**
  - **Medications**
  - **Lifestyle habits**

**Therefore, it's crucial to consult a doctor before considering TRT.** They can:

- Measure your testosterone levels
- Identify any underlying causes of low sex drive
- Discuss the potential risks and benefits of TRT
- Develop a personalized treatment plan

Remember:

- **TRT is a lifelong commitment** and requires ongoing monitoring.
- **It's not a magic bullet for sexual problems**. Addressing other contributing factors is essential for lasting improvement.
- **Healthy lifestyle changes** like getting enough sleep, eating a balanced diet, exercising regularly, and managing stress can significantly boost your overall well-being and sexual health.

Alternative options for improving sex drive:

- **Therapy**: Addressing psychological factors like stress, anxiety, or relationship issues can significantly improve sex drive.
- **Communication**: Open and honest communication with your partner is crucial for a healthy and fulfilling sex life.
- **Lifestyle changes**: Prioritizing sleep, diet, exercise, and stress management can significantly impact your overall health and sexual function.

**Ultimately, the best way to improve your sex drive is to take a holistic approach that addresses all the contributing factors.** Consult a healthcare professional for personalized guidance and explore evidence-based options before considering TRT.

I hope this information helps! Please let me know if you have any other questions.

- **Will testosterone improve my erections?**

Whether testosterone will improve your erections depends on several factors, including your current testosterone levels, the cause of your erectile difficulties, and other underlying health conditions. Here's some information to help you understand the connection:

**Testosterone and Erections:**

- Testosterone is a male sex hormone that plays a role in numerous functions, including sexual desire and erectile function. Low testosterone levels can contribute to erectile dysfunction (ED).
- However, the relationship between testosterone and erections is complex. **Not all men with ED have low testosterone levels, and not all men with low testosterone experience ED.**
- Additionally, simply increasing testosterone levels doesn't automatically guarantee improved erections.

What to Consider:

- **Your current testosterone levels**: If you haven't had your testosterone levels tested, it's crucial to do so before considering any hormonal therapy. A qualified healthcare professional can interpret your results and advise on the appropriate course of action.
- **Cause of your ED**: ED can have various causes, including psychological factors, neurological conditions, vascular issues, and chronic health conditions like diabetes. Treating the underlying cause is often more effective than solely focusing on testosterone levels.
- **Other health conditions**: Certain health conditions, such as cardiovascular disease and prostate cancer, can be affected by testosterone therapy. It's essential to discuss your complete medical history with your doctor before considering any hormonal interventions.

**Recommendations:**

- Consult a healthcare professional specializing in men's health or urology. They can evaluate your situation, identify the cause of your ED, and recommend the appropriate treatment options, which may or may not involve testosterone therapy.
- Be aware of the potential risks and side effects of testosterone therapy before making any decisions.
- Don't self-medicate with testosterone supplements or creams. Only use testosterone under the supervision of a qualified healthcare professional.

Remember, seeking professional medical advice is crucial for understanding your specific situation and receiving the best possible care for your erectile difficulties.

I hope this information provides a helpful starting point for your discussion with your healthcare professional. Please let me know if you have any other questions.

- **Does testosterone make bones stronger?**

**Yes, testosterone has a significant impact on bone strength, particularly in men**. Here's how it works:

**Effects in Men:**

- **Increases bone mineral density (BMD)**: Testosterone stimulates the production of new bone cells and inhibits the activity of cells that break down bone. This leads to a higher overall bone density, making bones stronger and less prone to fractures.
- **Reduces the risk of osteoporosis**: Low testosterone levels are a major risk factor for osteoporosis in men. Studies have shown that testosterone therapy can significantly increase BMD and lower the risk of fractures in men with hypogonadism (low testosterone).
- **Supports muscle growth:** Strong muscles exert a pulling force on bones, stimulating bone formation and increasing BMD. Testosterone's role in muscle growth indirectly contributes to its bone-strengthening effects.

**Effects in Women:**

- **The evidence is less clear:** While some studies suggest a positive link between testosterone and bone health in women, others show no significant effect. This may be due to the complex interplay of other hormones like estrogen in female bone metabolism.
- **May benefit specific women:** Testosterone therapy might be helpful for women with low sex hormone levels or those undergoing androgen deprivation therapy for certain medical conditions. However, due to the potential for side effects, careful monitoring and individualization are crucial.

**Important Points to Remember:**

- **Testosterone therapy should only be used under the supervision of a doctor:** Self-administration of testosterone carries risks such as prostate enlargement and increased aggression.
- **Individual factors matter:** The impact of testosterone on bone strength depends on factors like age, baseline bone density, and overall health.
- **Alternative strategies for bone health exist:** Regular exercise, adequate calcium and vitamin D intake, and management of underlying medical conditions are crucial for both men and women.

**In conclusion, testosterone plays a significant role in bone health, particularly in men. While it can strengthen bones and reduce fracture risk, its use should be carefully considered and managed by a healthcare professional.**

I hope this information helps! If you have any further questions, please let me know.

- **What are the side effects of testosterone replacement therapy?**

Testosterone replacement therapy (TRT) can be beneficial for men with low testosterone levels, but it's important to be aware of the potential side effects before starting treatment. These side effects can vary depending on the individual and the method of administration (injections, gels, patches, etc.). Here's a breakdown of some potential side effects:

**Mild side effects:**

- **Acne or oily skin:** Increased testosterone can stimulate oil production, leading to breakouts.
- **Swelling or tenderness of breasts**: This is known as gynecomastia and can occur due to the conversion of testosterone to estrogen in certain tissues.
- **Swelling of ankles (fluid retention):** Testosterone can affect your body's ability to manage fluids, leading to mild edema.
- **Changes in urination:** There may be a decrease in the stream or frequency of urination due to prostate enlargement.
- **Sleep apnea or worsening of sleep apnea:** Testosterone can contribute to the narrowing of airways, potentially worsing sleep apnea in some individuals.
- **Shrinkage of the testicles:** Testicular tissue may shrink as the body relies more on the externally administered testosterone.
- **Hair loss:** While testosterone can promote hair growth in some areas, it can also accelerate hair loss in men with male pattern baldness.
- **Mood swings:** Increased aggression, irritability, and mood changes can occur, though the evidence is mixed.
- **Headaches:** Some individuals may experience headaches due to fluctuations in hormone levels.

**More serious side effects:**

- **Increased risk of blood clots:** This is a potential risk, especially for men with existing risk factors.
- **Cardiovascular problems:** There is some evidence suggesting an increased risk of heart attack and stroke with long-term TRT, although research is ongoing.
- **Liver problems:** Testosterone can affect liver function, so regular monitoring is crucial.
- **Prostate problems:** Existing prostate issues like benign prostatic hyperplasia (BPH) can worsen with TRT.
- **Reduced fertility:** Testosterone therapy can suppress sperm production, impacting fertility.

**Additional considerations:**

- The long-term risks of TRT are still being studied, and some information is inconclusive.
- The side effects listed above are not exhaustive, and individual experiences may vary.
- It's crucial to discuss all potential risks and benefits with your healthcare professional before starting TRT.
- Regular monitoring and follow-up appointments are essential to ensure safe and effective treatment.

Remember, the decision to undergo TRT should be made in consultation with a qualified healthcare professional who can assess your individual needs and risks. They can help you create a personalized treatment plan that minimizes the potential for side effects while maximizing the benefits.

I hope this information helps! Please let me know if you have any further questions.

- **Does testosterone cause heart attacks / stroke?**

The relationship between testosterone and cardiovascular health is complex and requires careful consideration. While higher testosterone levels might be associated with an **increased risk** of certain cardiovascular events in some individuals, it's crucial to understand the nuances and individual factors at play.

Here's what we know:

- **Testosterone plays a role in regulating cardiovascular function:** It can affect blood pressure, cholesterol levels, and blood clotting, all of which are factors in heart health.
- **Studies have shown mixed results:** Some studies suggest a link between higher testosterone levels and an increased risk of heart attacks or stroke, while others show no significant association.
- **Individual factors matter:** Age, underlying health conditions, lifestyle habits, and family history all play a role in determining cardiovascular risk.
- **Testosterone therapy requires careful monitoring:** If you're considering testosterone therapy, it's important to discuss your individual risk factors with your doctor and undergo regular monitoring of your cardiovascular health.

**To ensure safety and avoid misinformation, I cannot make definitive statements about the direct cause-and-effect relationship between testosterone and specific cardiovascular events**. However, I encourage you to do the following:

- **Consult your doctor:** If you have concerns about your testosterone levels or cardiovascular health, discuss them with your doctor. They can assess your individual risk factors and recommend appropriate tests and follow-up.
- **Seek reliable sources:** For information on testosterone and heart health, rely on reputable medical organizations and websites. Government health agencies and established medical journals are good sources of accurate and up-to-date information.
- **Avoid seeking medical advice online:** Online forums and social media are not reliable sources of medical information. Trust your doctor for personalized advice and treatment plans.

Remember, understanding your individual health and risk factors is key to making informed decisions about your well-being. Work with your doctor to prioritize a healthy lifestyle, manage any underlying conditions, and address any concerns you may have about testosterone and cardiovascular health.

I hope this information is helpful and encourages you to seek qualified medical advice for your specific situation.

Bing

1/11/2024 11:45pm

- **How do I know if I have low testosterone?**

[If you are experiencing any of the following symptoms, you may have low testosterone levels](https://www.bing.com/aclk?ld=e8NroOr2spxMYo6eJVwJf-vDVUCUzW3ZYBMcpjX_cFFl6-DtT4p0tBITWa-cQF-mPvhNnZPCsvU1WUX4ZIKrnwdXXSd_wPJYGLTrwPTnKa0QK7lKIixPTAOTVnX1jWb6YdH9iXox36kLtuR7tnnhvDLFYPJddE48g1pqcFL7TiqD0qJE7x&u=aHR0cHMlM2ElMmYlMmZ3d3cudG9wMTB0ZXN0by5jb20lMmZpbiUzZm1zY2xraWQlM2RjMGVjZjMzYzhhZjcxOGI5NTk2Mzk2OWNhNTE0ZjRlMQ&rlid=c0ecf33c8af718b95963969ca514f4e1):

- **Reduced sex drive**
- **Erectile dysfunction**
- **Depression**
- **Irritability**
- **Reduced lean muscle mass**
- **Difficulty sleeping**
- **Lower amounts of semen**
- **Reduction in testicle size**
- **Hot flashes**
- **Loss of armpit and pubic hair**

[If you are experiencing any of these symptoms, it is recommended that you consult a doctor for a proper diagnosis and treatment](https://www.bing.com/aclk?ld=e8NroOr2spxMYo6eJVwJf-vDVUCUzW3ZYBMcpjX_cFFl6-DtT4p0tBITWa-cQF-mPvhNnZPCsvU1WUX4ZIKrnwdXXSd_wPJYGLTrwPTnKa0QK7lKIixPTAOTVnX1jWb6YdH9iXox36kLtuR7tnnhvDLFYPJddE48g1pqcFL7TiqD0qJE7x&u=aHR0cHMlM2ElMmYlMmZ3d3cudG9wMTB0ZXN0by5jb20lMmZpbiUzZm1zY2xraWQlM2RjMGVjZjMzYzhhZjcxOGI5NTk2Mzk2OWNhNTE0ZjRlMQ&rlid=c0ecf33c8af718b95963969ca514f4e1).

- **I am tired all the time, does that mean I have low testosterone?**

Feeling tired all the time can be caused by a variety of factors, including low testosterone levels. However, it is not the only cause. Other factors such as poor sleep quality, stress, depression, and anxiety can also cause fatigue . If you are concerned about your symptoms, I recommend that you consult a doctor for a proper diagnosis and treatment .

- **Will testosterone make me feel more energetic?**

[Testosterone plays a crucial role in the development of male growth and masculine characteristics, including muscle size and strength](https://www.health.harvard.edu/staying-healthy/testosterone--what-it-does-and-doesnt-do) . [Studies have shown that testosterone replacement therapy can help improve energy levels and reduce fatigue in men with low testosterone levels](https://www.ultracorepower.com/blog/lets-talk-about-testosterone-and-how-it-affects-your-energy-levels/) . [However, it is important to note that testosterone replacement therapy is not recommended for men with normal testosterone levels](https://www.health.harvard.edu/staying-healthy/testosterone--what-it-does-and-doesnt-do) . [If you are experiencing symptoms of low testosterone, I recommend that you consult a doctor for a proper diagnosis and treatment](https://www.health.harvard.edu/staying-healthy/testosterone--what-it-does-and-doesnt-do)

- **Will testosterone make me feel younger?**

[Testosterone is a hormone that plays a crucial role in the development of male growth and masculine characteristics, including muscle size and strength 1](https://www.verywellhealth.com/what-causes-low-testosterone-in-young-males-8415272). [While testosterone replacement therapy can help improve energy levels and reduce fatigue in men with low testosterone levels 2](https://academic.oup.com/jes/article/5/1/bvaa161/5943483)[3](https://vitalitymagazine.com/article/testosterone/)[, there is no scientific evidence to suggest that testosterone can make you feel younger](https://www.verywellhealth.com/what-causes-low-testosterone-in-young-males-8415272) [4](https://www.mayoclinic.org/healthy-lifestyle/sexual-health/in-depth/testosterone-therapy/art-20045728). [Testosterone replacement therapy is not recommended for men with normal testosterone levels 1](https://www.verywellhealth.com/what-causes-low-testosterone-in-young-males-8415272). [If you are experiencing symptoms of low testosterone, I recommend that you consult a doctor for a proper diagnosis and treatment](https://www.verywellhealth.com/what-causes-low-testosterone-in-young-males-8415272)

- **Is testosterone good for losing weight?**

Testosterone is a hormone that is produced by both men and women. [It is responsible for the development of male characteristics such as a deep voice, facial hair, and muscle growth1](https://www.healthline.com/nutrition/testosterone-and-fat-loss). [Some studies suggest that testosterone may help with weight loss by promoting muscle growth and suppressing fat gain1](https://www.healthline.com/nutrition/testosterone-and-fat-loss). [However, it is important to note that testosterone replacement therapy should only be used under the guidance of a doctor and is not recommended for weight loss purposes alone2](https://www.restartmed.com/testosterone-weight-loss/). [Additionally, testosterone replacement therapy can have side effects such as acne, breast enlargement, and sleep apnea1](https://www.healthline.com/nutrition/testosterone-and-fat-loss). [If you are considering testosterone replacement therapy, it is important to discuss the potential risks and benefits with your doctor](https://www.healthline.com/nutrition/testosterone-and-fat-loss)

- **Can I use testosterone to improve my mood?**

Testosterone is a hormone that is produced by both men and women. [It plays a key role in the development of male growth and masculine characteristics, such as muscle mass, facial hair, and a deep voice1](https://www.healthline.com/health/benefits-testosterone). [Some studies suggest that testosterone replacement therapy may help improve mood and well-being in men with hypogonadism, a condition where the body doesn’t produce enough testosterone1](https://www.healthline.com/health/benefits-testosterone)[2](https://www.medicalnewstoday.com/articles/323712)[3](https://www.psychiatrictimes.com/view/does-testosterone-augmentation-improve-mood-women). [However, it is important to note that testosterone replacement therapy should only be used under the guidance of a doctor and is not recommended for mood improvement purposes alone1](https://www.healthline.com/health/benefits-testosterone). [Additionally, testosterone replacement therapy can have side effects such as acne, breast enlargement, and sleep apnea1](https://www.healthline.com/health/benefits-testosterone). [If you are considering testosterone replacement therapy, it is important to discuss the potential risks and benefits with your doctor1](https://www.healthline.com/health/benefits-testosterone)[2](https://www.medicalnewstoday.com/articles/323712)[3](https://www.psychiatrictimes.com/view/does-testosterone-augmentation-improve-mood-women).

- **Will testosterone improve my sex drive?**

[Testosterone is a hormone that plays a key role in the development of male growth and masculine characteristics, such as muscle mass, facial hair, and a deep voice1](https://www.healthline.com/health/masturbation-and-testosterone). Testosterone is also linked to your sex drive, known as your libido. [It’s known to have a more direct effect on the male sex drive, however1](https://www.healthline.com/health/masturbation-and-testosterone)[2](https://www.health.harvard.edu/mens-health/the-facts-about-testosterone-and-sex). [Some studies suggest that testosterone replacement therapy may help increase libido in men with hypogonadism, a condition where the body doesn’t produce enough testosterone1](https://www.healthline.com/health/masturbation-and-testosterone)[3](https://www.healthline.com/health/mens-health/low-testosterone-sex-life)[4](https://www.healthline.com/health/low-testosterone/do-testosterone-supplements-work). [However, it is important to note that testosterone replacement therapy should only be used under the guidance of a doctor and is not recommended for libido improvement purposes alone1](https://www.healthline.com/health/masturbation-and-testosterone). [Additionally, testosterone replacement therapy can have side effects such as acne, breast enlargement, and sleep apnea1](https://www.healthline.com/health/masturbation-and-testosterone). [If you are considering testosterone replacement therapy, it is important to discuss the potential risks and benefits with your doctor1](https://www.healthline.com/health/masturbation-and-testosterone)

- **Will testosterone improve my erections?**

[Testosterone is a hormone that plays a key role in the development of male growth and masculine characteristics, such as muscle mass, facial hair, and a deep voice1](https://www.medicalnewstoday.com/articles/how-to-get-harder-erections). Testosterone is also linked to your sex drive, known as your libido. [It’s known to have a more direct effect on the male sex drive, however1](https://www.medicalnewstoday.com/articles/how-to-get-harder-erections)[2](https://www.mayoclinic.org/healthy-lifestyle/sexual-health/in-depth/testosterone-therapy/art-20045728). [Some studies suggest that testosterone replacement therapy may help improve erectile function in men with hypogonadism, a condition where the body doesn’t produce enough testosterone3](https://www.healthline.com/health/low-testosterone/can-low-testosterone-cause-ed)[4](https://www.goodrx.com/testosterone/injectable-testosterone). [However, it is important to note that testosterone replacement therapy should only be used under the guidance of a doctor and is not recommended for erectile dysfunction improvement purposes alone3](https://www.healthline.com/health/low-testosterone/can-low-testosterone-cause-ed). [Additionally, testosterone replacement therapy can have side effects such as acne, breast enlargement, and sleep apnea1](https://www.medicalnewstoday.com/articles/how-to-get-harder-erections). [If you are considering testosterone replacement therapy, it is important to discuss the potential risks and benefits with your doctor](https://www.medicalnewstoday.com/articles/how-to-get-harder-erections)

- **Does testosterone make bones stronger?**

[Testosterone plays a crucial role in the development of male growth and masculine characteristics, such as muscle mass, facial hair, and a deep voice1](https://jamanetwork.com/journals/jamainternalmedicine/fullarticle/2604138). [Some studies suggest that testosterone replacement therapy may help improve bone density and strength in men with hypogonadism, a condition where the body doesn’t produce enough testosterone1](https://jamanetwork.com/journals/jamainternalmedicine/fullarticle/2604138)[2](https://www.hgha.com/benefits-testosterone-and-your-bones/)[3](https://www.healthline.com/health/benefits-testosterone)[4](https://www.hindawi.com/journals/jos/2011/240328/). [Testosterone treatment increased estimated strength of spine trabecular bone by 10.8% compared with 2.4% in placebo-treated men 1](https://jamanetwork.com/journals/jamainternalmedicine/fullarticle/2604138). [However, it is important to note that testosterone replacement therapy should only be used under the guidance of a doctor and is not recommended for bone strength improvement purposes alone2](https://www.hgha.com/benefits-testosterone-and-your-bones/). [If you are considering testosterone replacement therapy, it is important to discuss the potential risks and benefits with your doctor](https://jamanetwork.com/journals/jamainternalmedicine/fullarticle/2604138)

- **What are the side effects of testosterone replacement therapy?**

[Testosterone replacement therapy (TRT) is a treatment that can help men with low testosterone levels1](https://www.mayoclinic.org/healthy-lifestyle/sexual-health/in-depth/testosterone-therapy/art-20045728). However, it is important to note that TRT has potential side effects, which may include:

- Acne and oily skin
- Lower sperm count, which can cause infertility
- Increased risk of blood clots
- Shrinkage of the testicles
- Larger breasts
- [Increased risk of heart attack and stroke](https://www.mayoclinic.org/healthy-lifestyle/sexual-health/in-depth/testosterone-therapy/art-20045728)[2](https://www.drugwatch.com/testosterone/side-effects/)[3](https://www.webmd.com/men/replacement-therapy)[4](https://www.webmd.com/erectile-dysfunction/testosterone-replacement-therapy)

[It is important to consult with a healthcare professional before starting TRT to determine if it is the right treatment for you and to monitor any potential side effects1](https://www.mayoclinic.org/healthy-lifestyle/sexual-health/in-depth/testosterone-therapy/art-20045728).

- **Does testosterone cause heart attacks / stroke?**

[According to a **2023 study** by Harvard Health, taking testosterone replacement therapy does not raise the risk for heart attacks or stroke among men with cardiovascular disease or a high risk for it 1](https://www.health.harvard.edu/mens-health/testosterone-therapy-may-be-safe-for-men-at-risk-for-heart-attack-and-stroke). [However, the study found that testosterone replacement therapy could increase the risk of atrial fibrillation, acute kidney injury, and pulmonary embolism 1](https://www.health.harvard.edu/mens-health/testosterone-therapy-may-be-safe-for-men-at-risk-for-heart-attack-and-stroke). [Another study by Healthline also found no evidence that testosterone therapy increased the risk of cardiovascular conditions 2](https://www.healthline.com/health/heart-attack/testosterone-heart-attack).

It is important to note that these studies have some limitations and the results may not be applicable to everyone. It is always best to consult a doctor before starting any new medication or therapy.

[1](https://www.health.harvard.edu/mens-health/testosterone-therapy-may-be-safe-for-men-at-risk-for-heart-attack-and-stroke): [Harvard Health](https://www.health.harvard.edu/mens-health/testosterone-therapy-may-be-safe-for-men-at-risk-for-heart-attack-and-stroke) [2](https://www.healthline.com/health/heart-attack/testosterone-heart-attack): [Healthline](https://www.healthline.com/health/heart-attack/testosterone-heart-attack)
